# Supplementary material for: MECOM and the PRDM gene family in uterine endometrial cancer: bioinformatics and experimental insights into pathogenesis and therapeutic potentials
Source: Mol Med. 2024 Oct 28;30:190. doi: 10.1186/s10020-024-00946-0 (PMC11514642; doi:10.1186/s10020-024-00946-0)

### Promoter methylation level of PRDM1

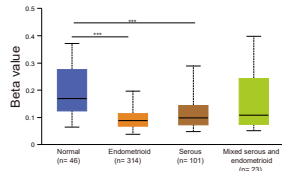

Promoter methylation level of PRDM2

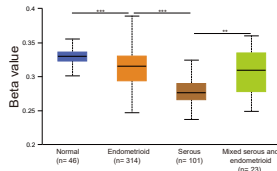

Promoter methylation level of MECOM

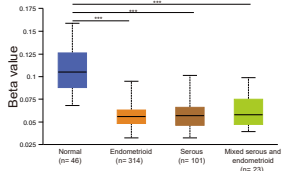

### Promoter methylation level of PRDM4

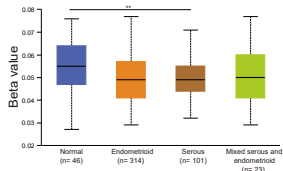

Promoter methylation level of PRDM5

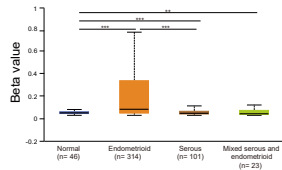

Promoter methylation level of PRDM6

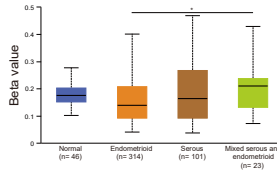

Promoter methylation level of PRDM7

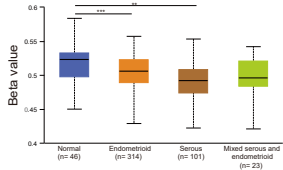

Promoter methylation level of PRDM8

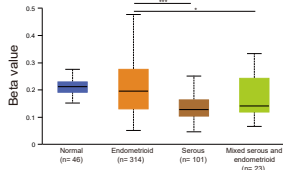

Promoter methylation level of PRDM9

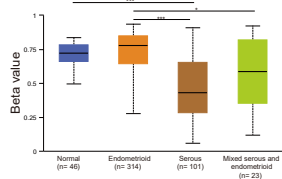

Promoter methylation level of PRDM10

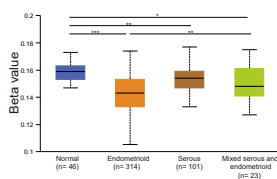

Promoter methylation level of PRDM11

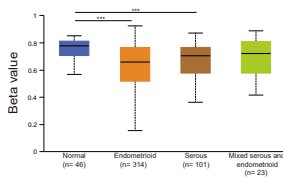

Promoter methylation level of PRDM12

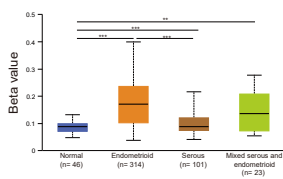

Promoter methylation level of PRDM13

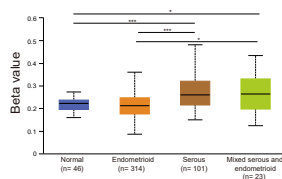

Promoter methylation level of PRDM14

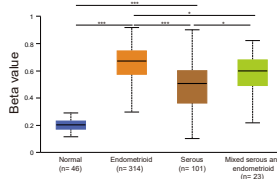

Promoter methylation level of PRDM15

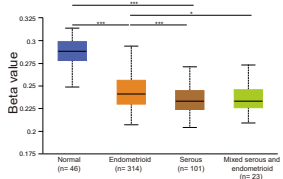

Promoter methylation level of PRDM16

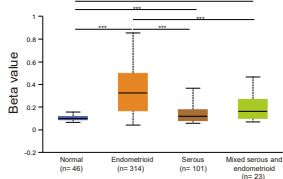

Supplement: Supplementary file 4 — Additional file 4 [file 10020_2024_946_MOESM4_ESM.pdf]
