# Supplementary material for: MECOM and the PRDM gene family in uterine endometrial cancer: bioinformatics and experimental insights into pathogenesis and therapeutic potentials
Source: Mol Med. 2024 Oct 28;30:190. doi: 10.1186/s10020-024-00946-0 (PMC11514642; doi:10.1186/s10020-024-00946-0)

### Expression of PRDM1 based on cancer stages

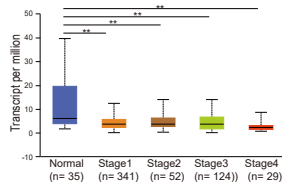

### Expression of PRDM2 based on cancer stages

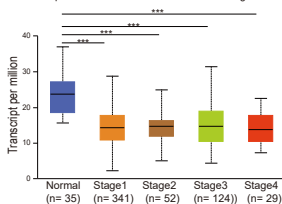

### Expression of MECOM based on cancer stage

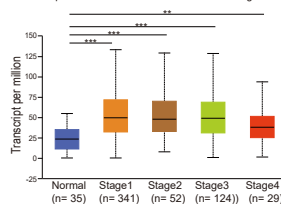

#### Expression of PRDM4 based on cancer stages

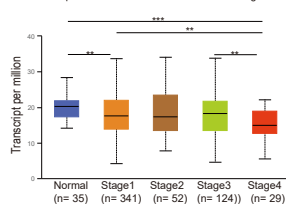

#### Expression of PRDM5 based on cancer stages

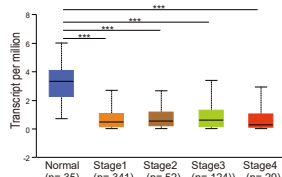

### Expression of PRDM6 based on cancer stages

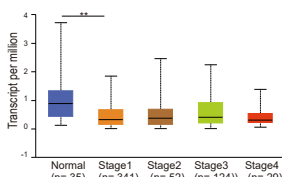

### Expression of PRDM7 based on cancer stages

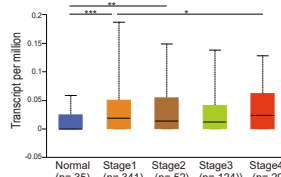

#### Expression of PRDM8 based on cancer stages

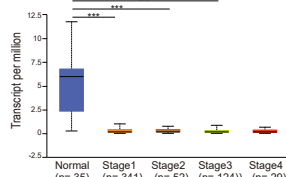

### Expression of PRDM9 based on cancer stages

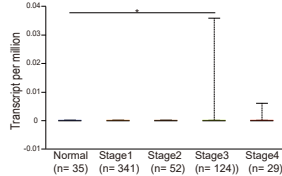

### Expression of PRDM10 based on cancer stages

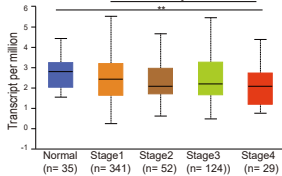

#### Expression of PRDM11 based on cancer stages

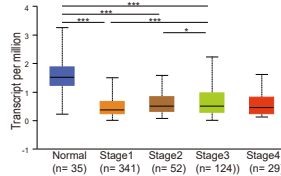

#### Expression of PRDM12 based on cancer stage

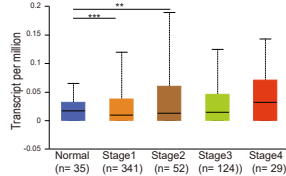

### Expression of PRDM13 based on cancer stages

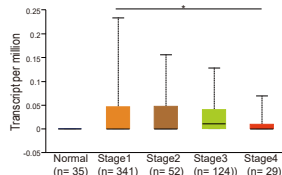

### Expression of PRDM14 based on cancer stages

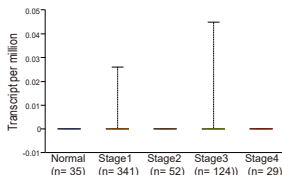

#### Expression of PRDM15 based on cancer stages

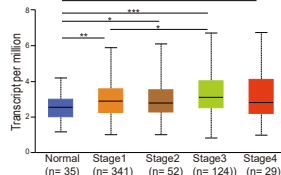

#### Expression of PRDM16 based on cancer stage

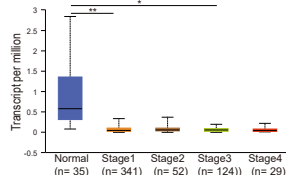

Supplement: Supplementary file 9 — Additional file 9 [file 10020_2024_946_MOESM9_ESM.pdf]
