# Supplementary material for: MECOM and the PRDM gene family in uterine endometrial cancer: bioinformatics and experimental insights into pathogenesis and therapeutic potentials
Source: PubMed Central journal article supplement (PMC11514642; doi:10.1186/s10020-024-00946-0), 2024-10-28

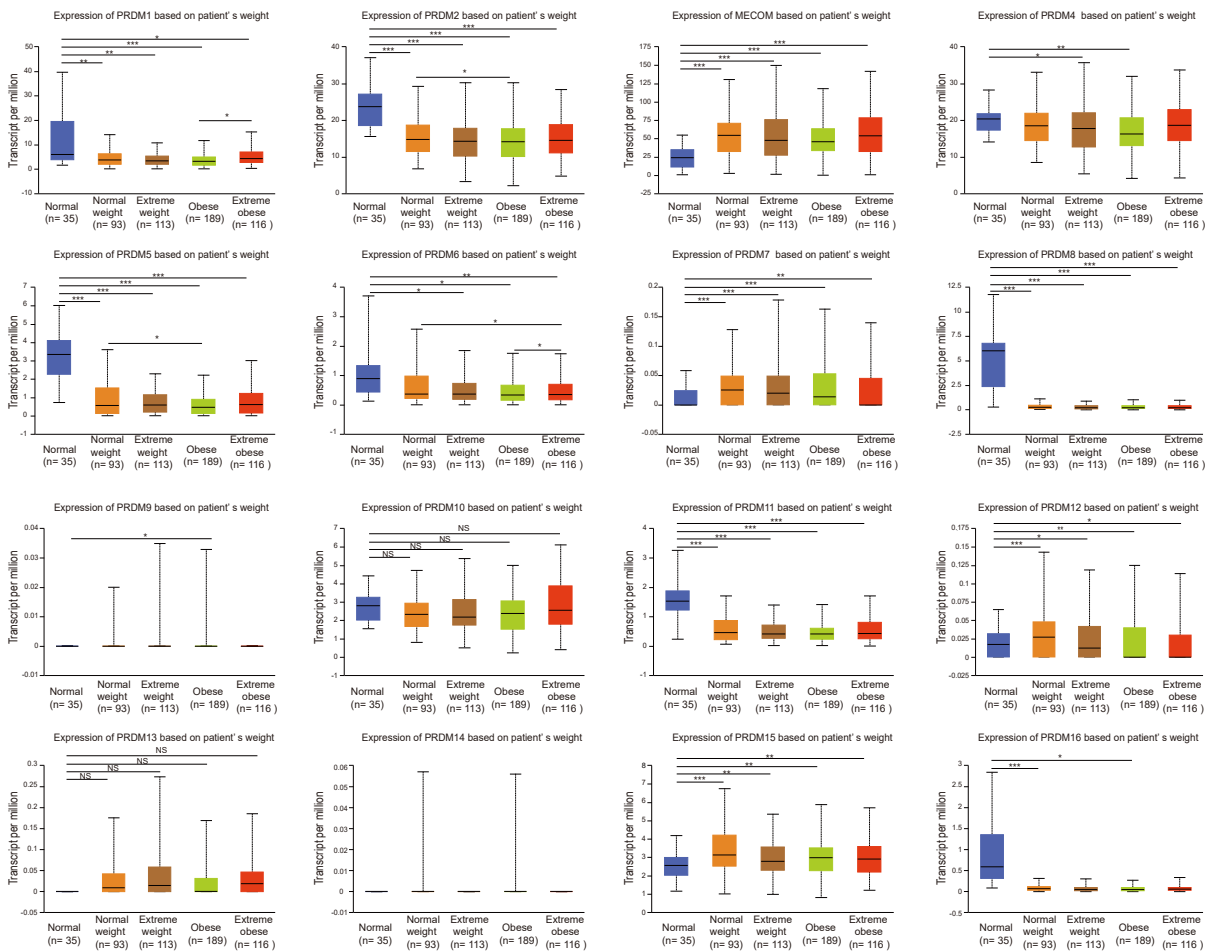

Supplement: 10020_2024_946_MOESM1_ESM.pdf [file 10020_2024_946_MOESM1_ESM.pdf]
